# Supplementary material for: Dependence of the solid-state photomechanical response of 4-chlorocinnamic acid on crystal shape and size
Source: Royal Society of Chemistry journal article supplement (doi:10.1039/c2ce25811k), 2012-01-01
Supplement: c2ce25811k.pdf [file c2ce25811k.pdf]

## Supplemental Information

### Dependence of the solid-state photomechanical response of 4-chlorocinnamic acid on crystal shape and size

Taehyung Kim, Lingchao Zhu, Leonard J. Mueller and Christopher J. Bardeen\*

Department of Chemistry, University of California, Riverside, CA 92521, U.S.A. Email: christopher.bardeen@ucr.edu; Fax: +1-951-827-4713; Phone: +1-951-827-2723.

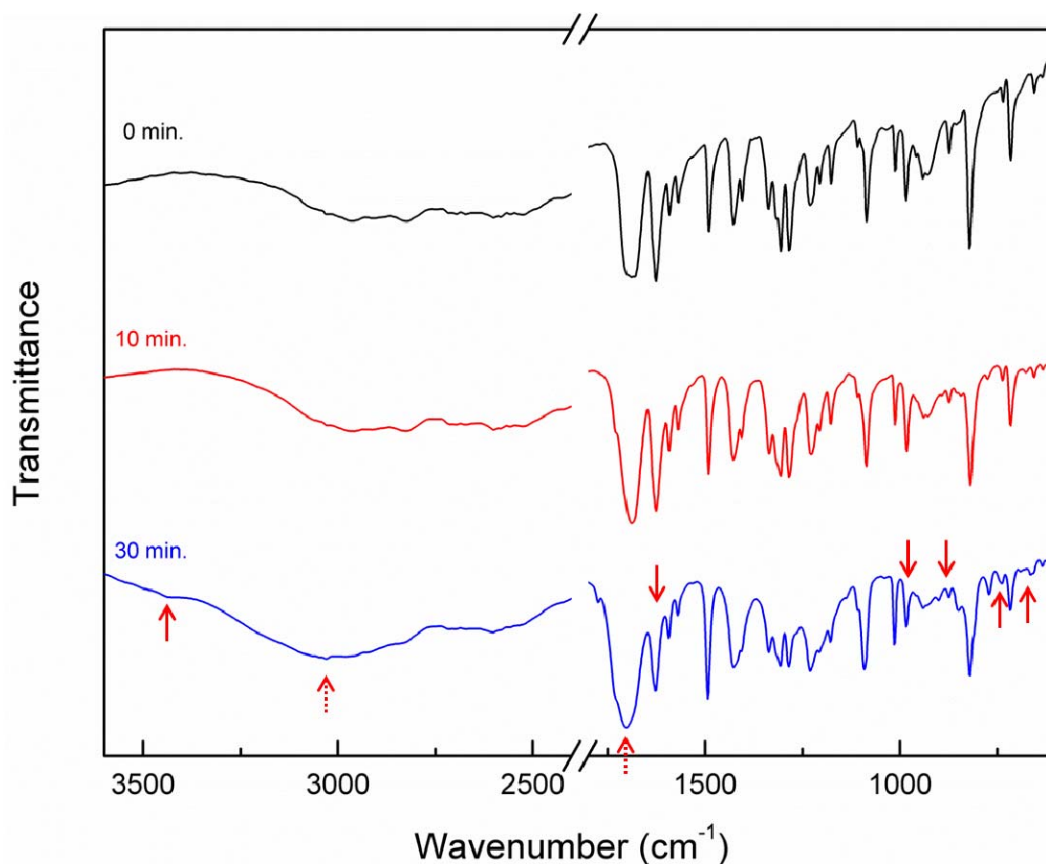

**Figure S1.** Infrared spectra of 4Cl-CA microcrystals under UV exposure for 0 minutes (top, black), 10 minutes (middle, red), and 30 minutes (bottom, blue) (KBr pallet, room temperature). As the photoreaction progresses, the aliphatic C=C stretching mode (1620 cm<sup>-1</sup>) decreases and the cyclobutane ring deformation vibrations (672 and 745 cm<sup>-1</sup>) increase, indicating [2+2] photodimerization. Disruption of the hydrogen-bonding network in the **4Cl-CA** crystal by photoreaction is inferred from the decrease in the peak at 942 cm<sup>-1</sup> (O-H deformation out of plane), the shift and broadening of the peak at 1700 cm<sup>-1</sup>

(C=O stretching), the shift of the broad peak around  $2970\text{ cm}^{-1}$  (O-H stretching) to higher frequency, and the appearance of a new peak at  $3440\text{ cm}^{-1}$  suggestive of free OH groups. All these changes are marked by arrows (solid arrows for appearing or diminishing peaks and dotted arrows for shifting peaks) in the 30 minute spectrum.

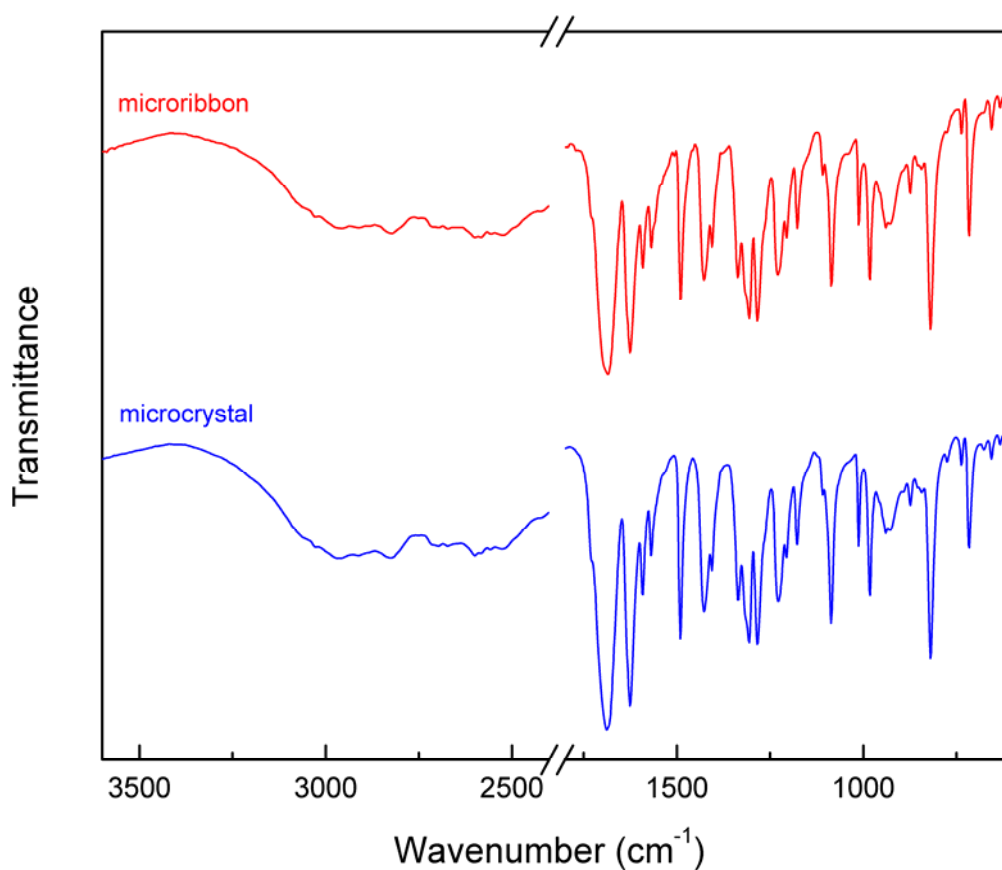

**Figure S2.** Comparison of infrared spectra of 4Cl-CA microribbon (top, red) and 4Cl-CA microcrystal (bottom, blue). Both samples are exposed under UV for 10 minutes.
